# Supplementary material
Source: PubMed Central journal article supplement (PMC3606914)

**Supplementary Material for**  
**Electron Transfer Dissociation of Milk Oligosaccharides**  
*Journal of the American Society for Mass Spectrometry*

**Liang Han<sup>1,2</sup> and Catherine E. Costello<sup>1,2,3,\*</sup>**

**<sup>1</sup>Center for Biomedical Mass Spectrometry**

**<sup>2</sup>Department of Chemistry, Boston University and**

**<sup>3</sup>Department of Biochemistry, Boston University School of Medicine**

**Running title: ETD of milk oligosaccharides**

**\*Correspondence to:**

**Prof. Catherine E. Costello**

**Center for Biomedical Mass Spectrometry**

**Boston University School of Medicine**

**670 Albany Street, Rm. 511**

**Boston, MA 02118-2646**

**tel: (617) 638-6490**

**fax: (617) 638-6491**

**email: [cecmsms@bu.edu](mailto:cecmsms@bu.edu)**

1. (a) CID and (b) ETD fragmentation of permethylated LNT  $[M + Mg]^{2+}$   $m/z$  463.6

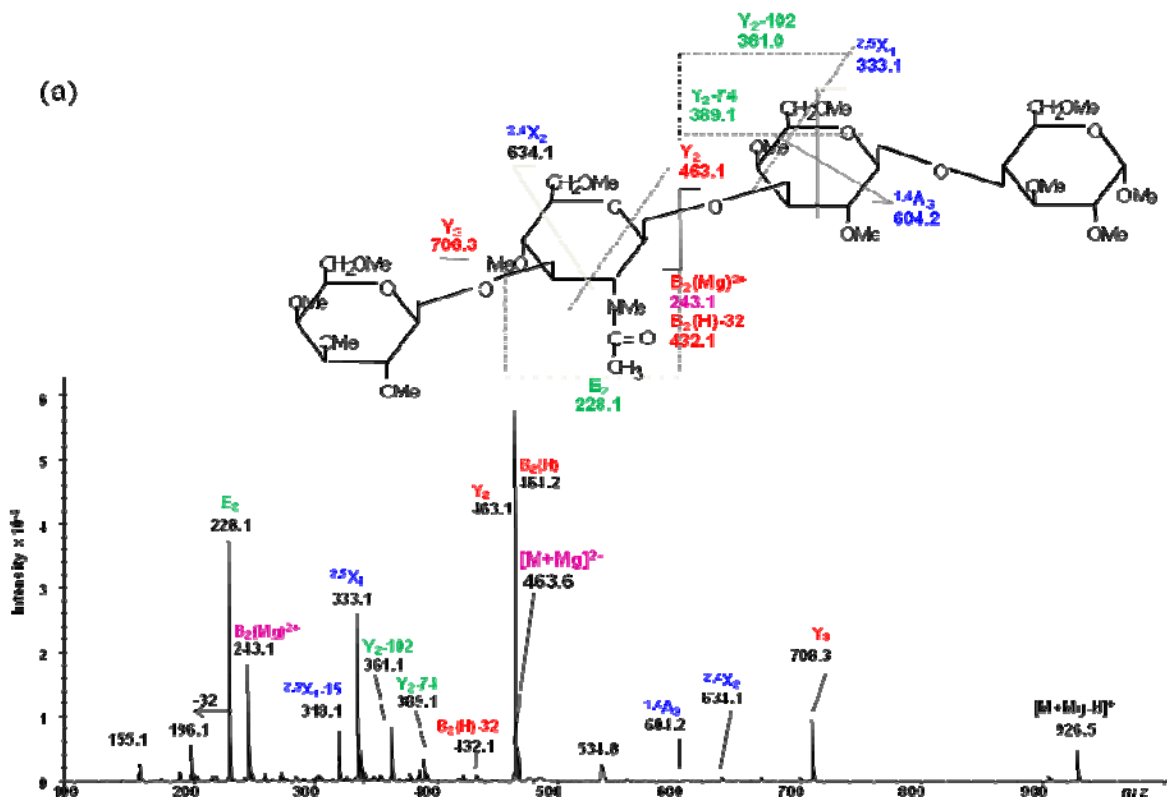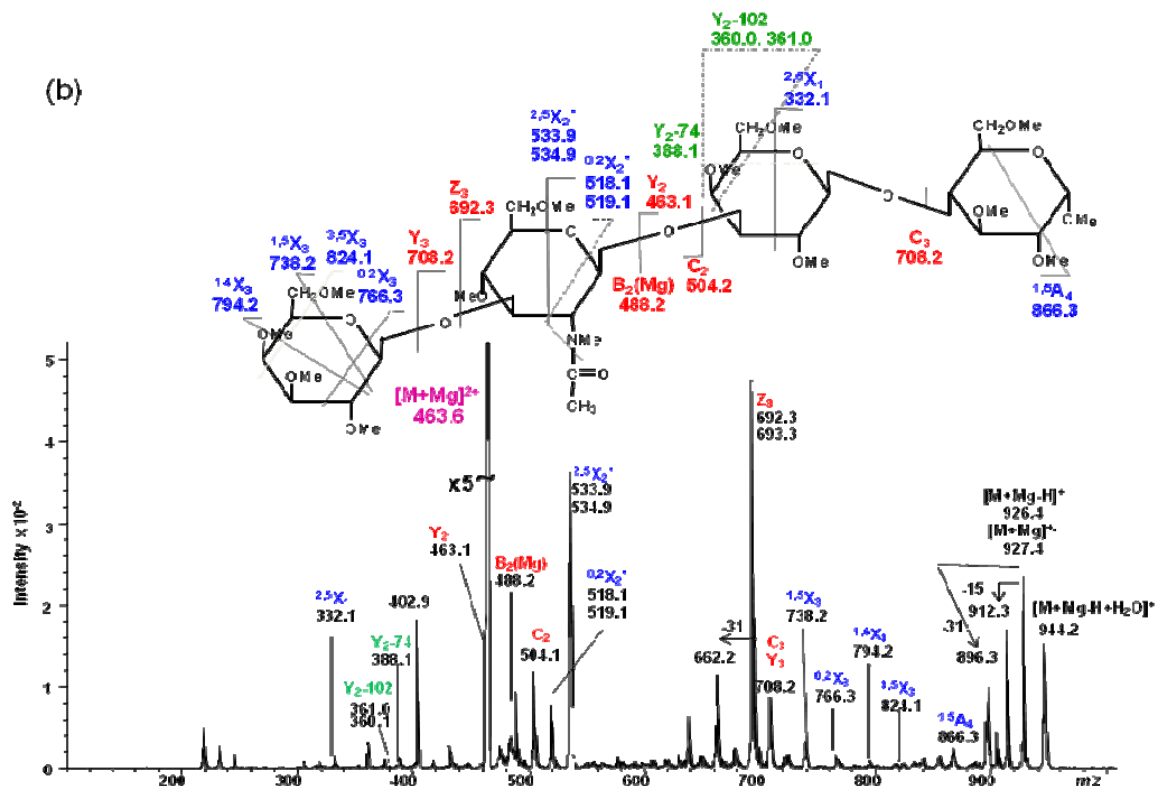

2. (a) CID and (b) ETD fragmentation of permethylated LNnT  $[M + Mg]^{2+}$   $m/z$  463.6

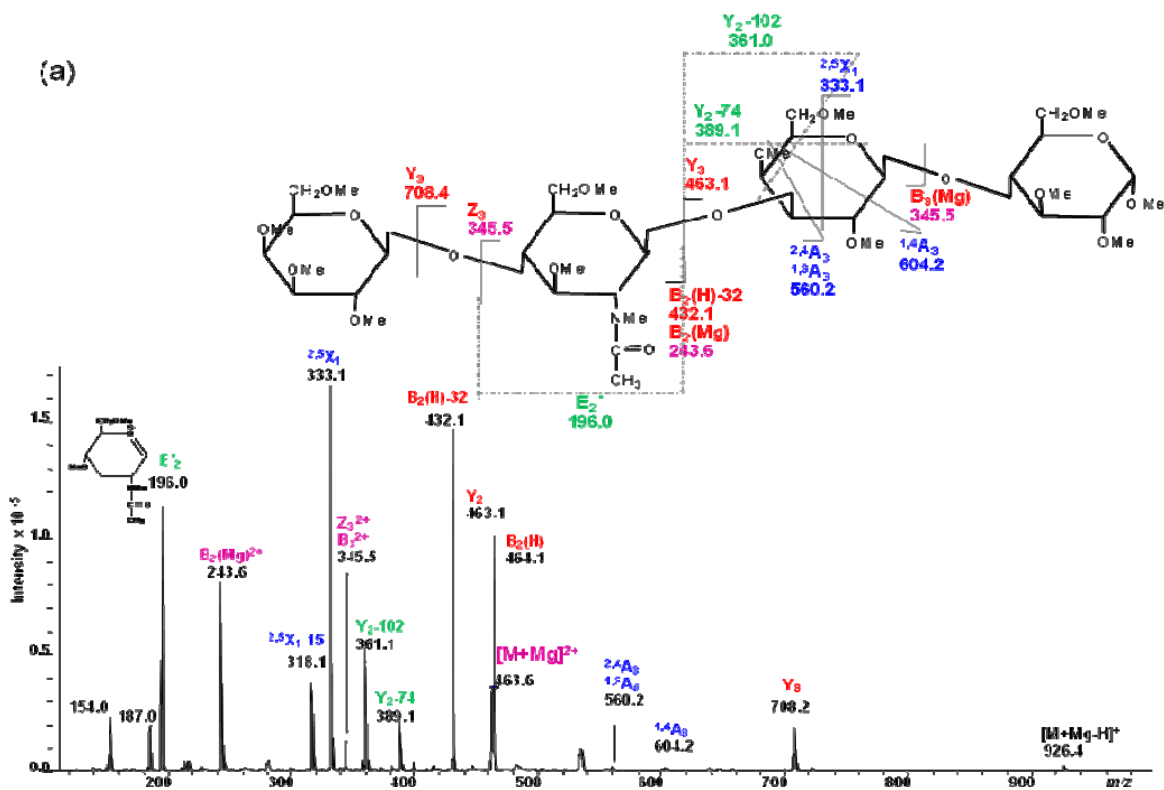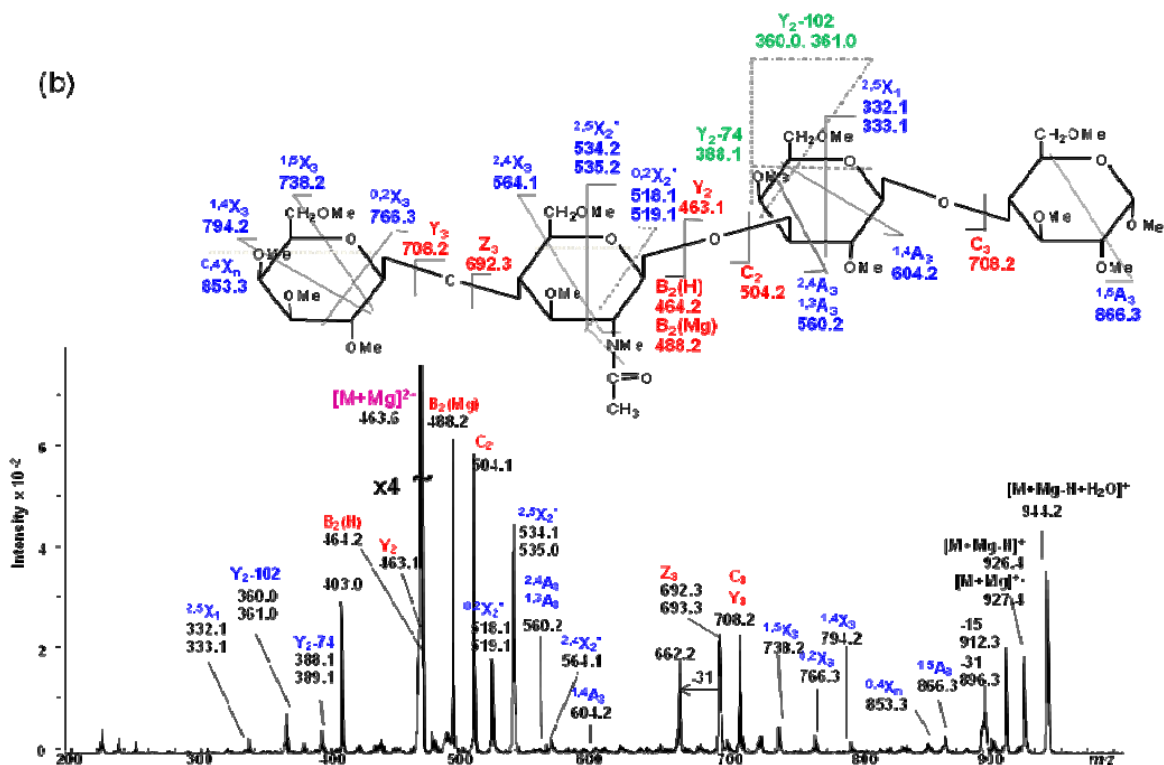

3. (a) CID and (b) ETD fragmentation of permethylated LSTa  $[M + Mg]^{2+}$   $m/z$  644.2.

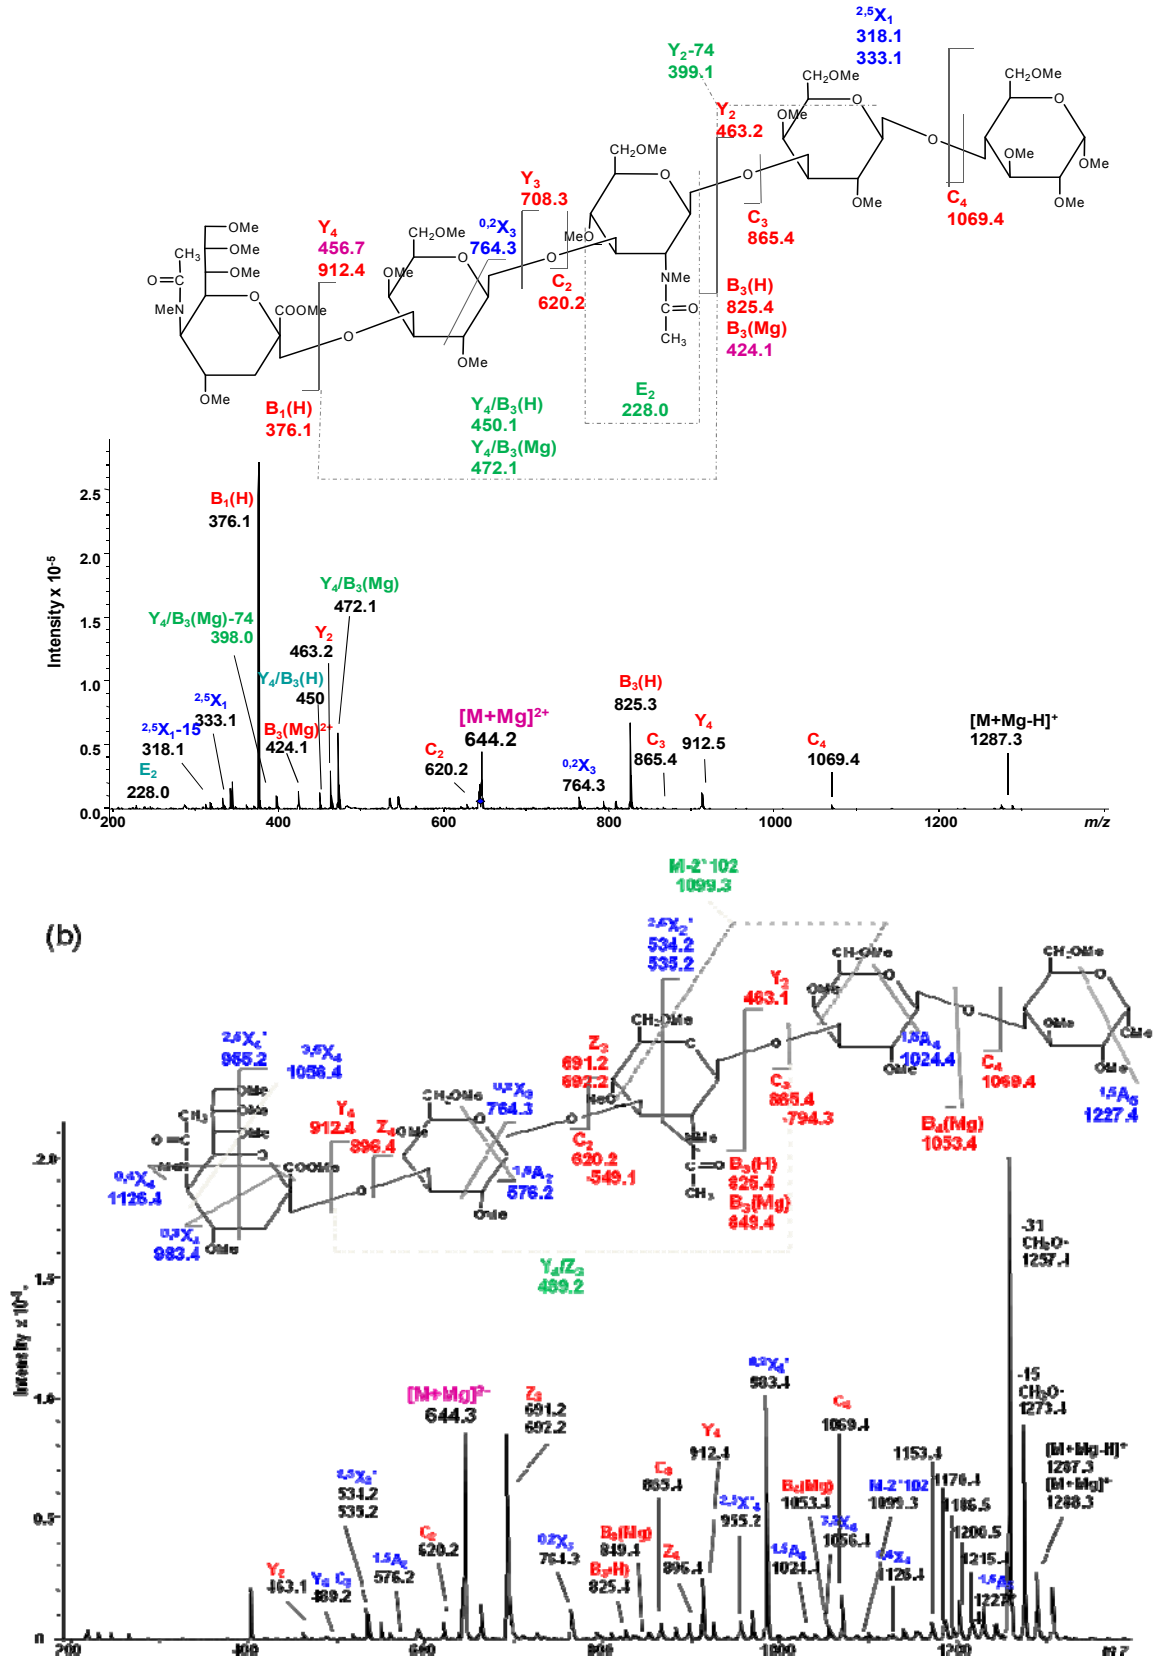

4. (a) CID and (b) ETD fragmentation of permethylated LSTc  $[M + Mg]^{2+}$   $m/z$  644.2.

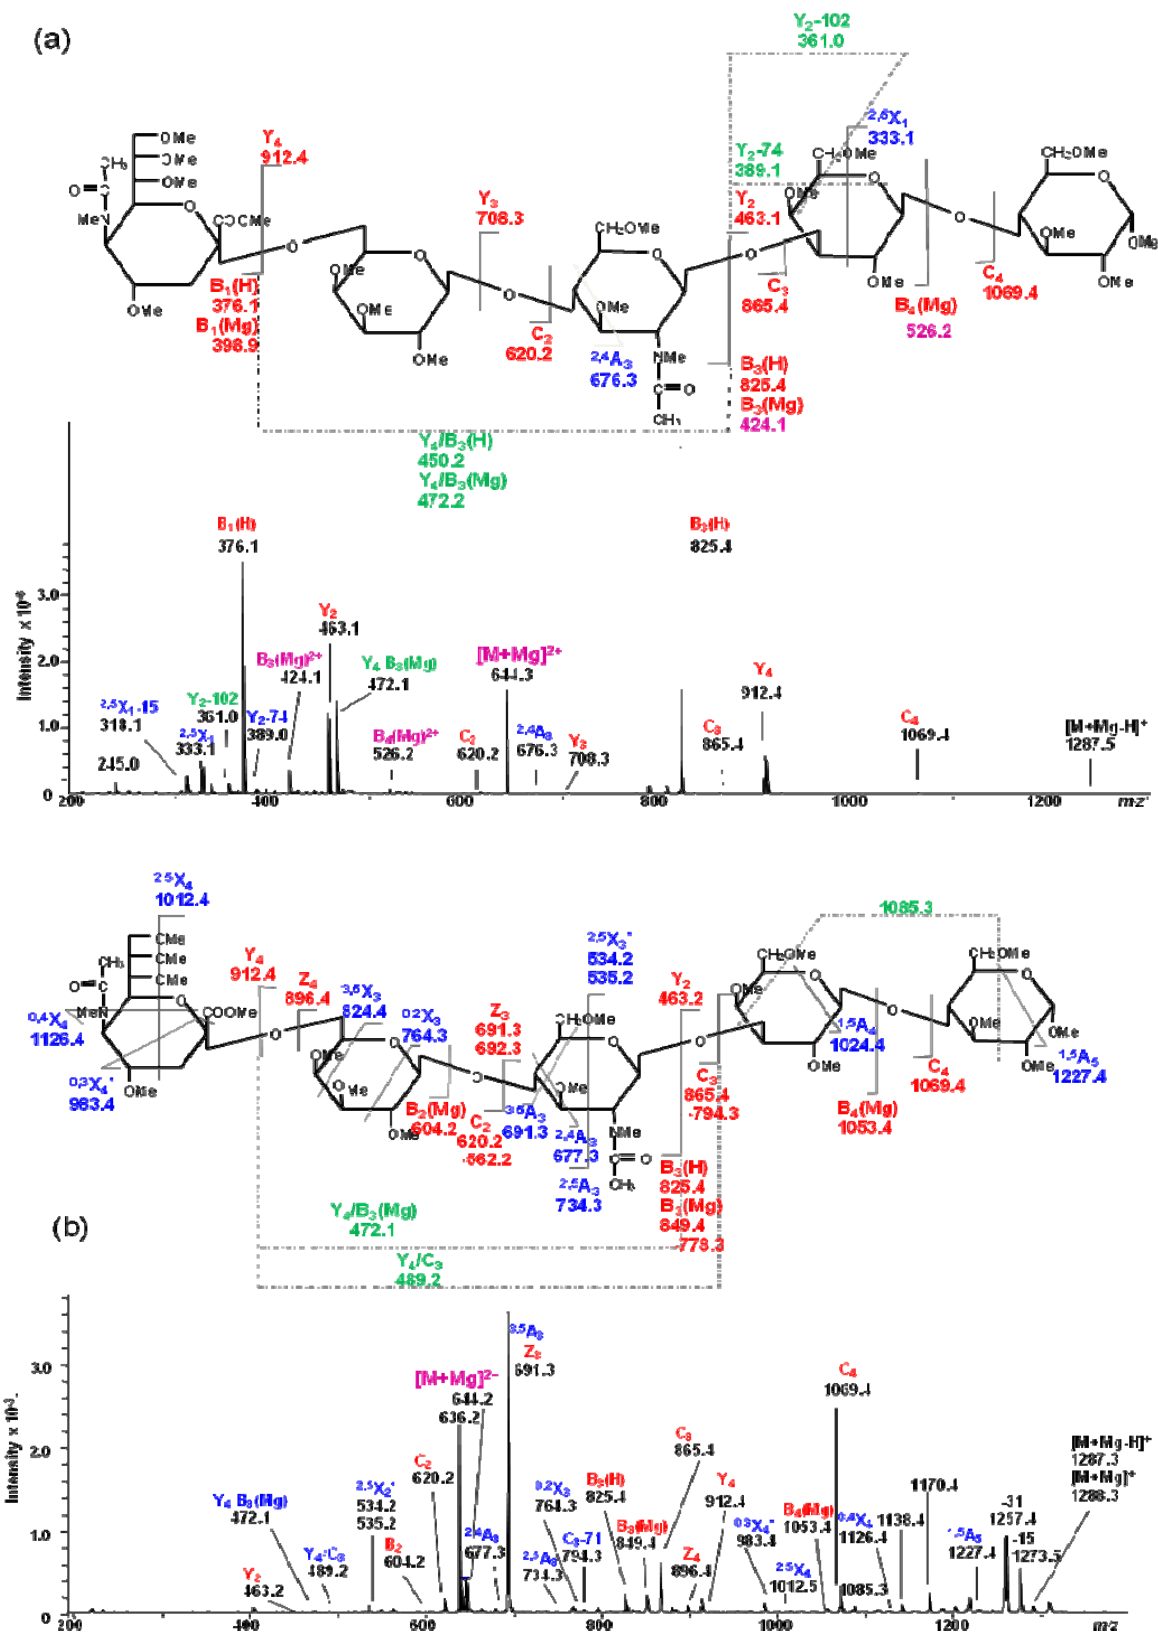

5. (a) CID and (b) ETD fragmentation of permethylated LSTb  $[M + Mg]^{2+}$   $m/z$  644.2.

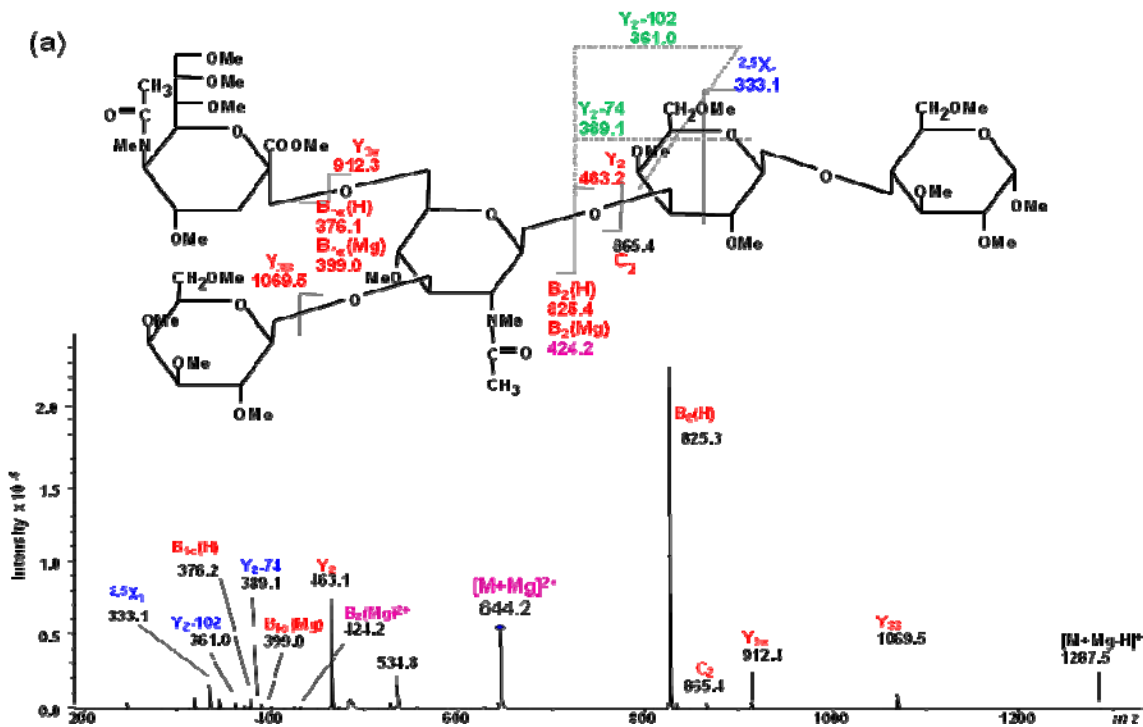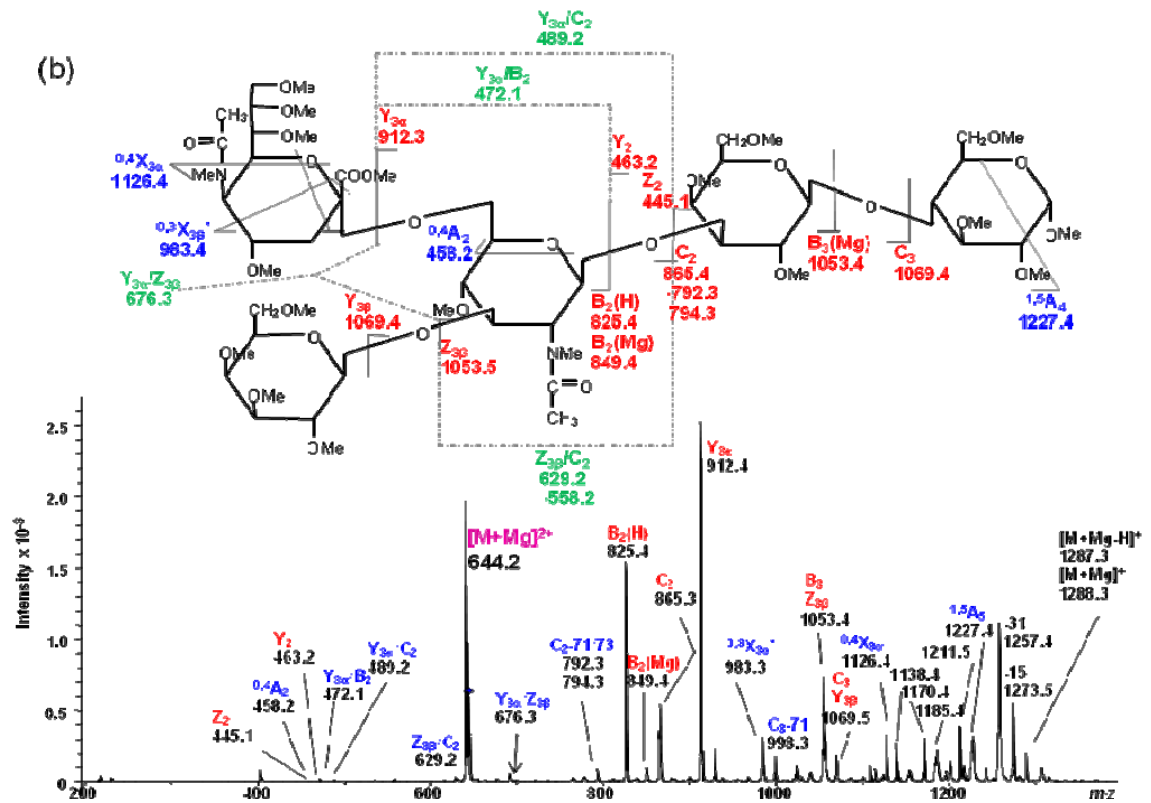

6. (a) CID and (b) ETD fragmentation of  $^{16}\text{O}/^{18}\text{O}$  labeled and permethylated LNT  $[\text{M} + \text{Mg}]^{2+}$   $m/z$  463.6/464.6. Fragment ion assignments correspond to  $^{18}\text{O}$ -labeled species.

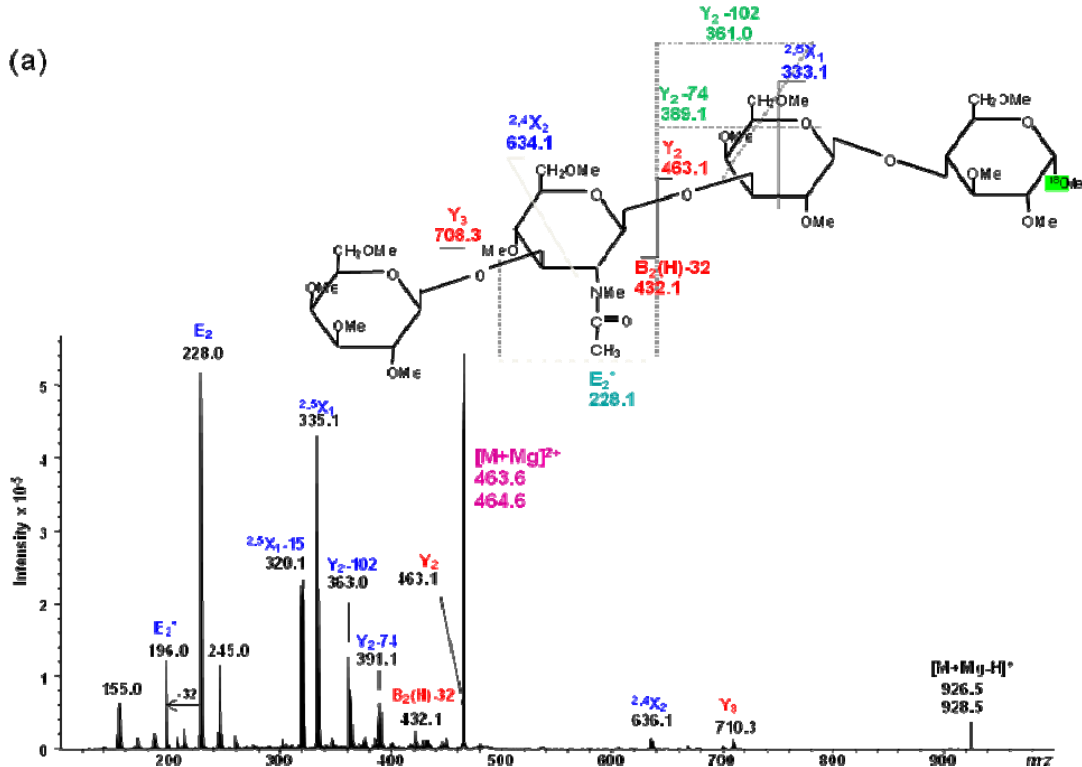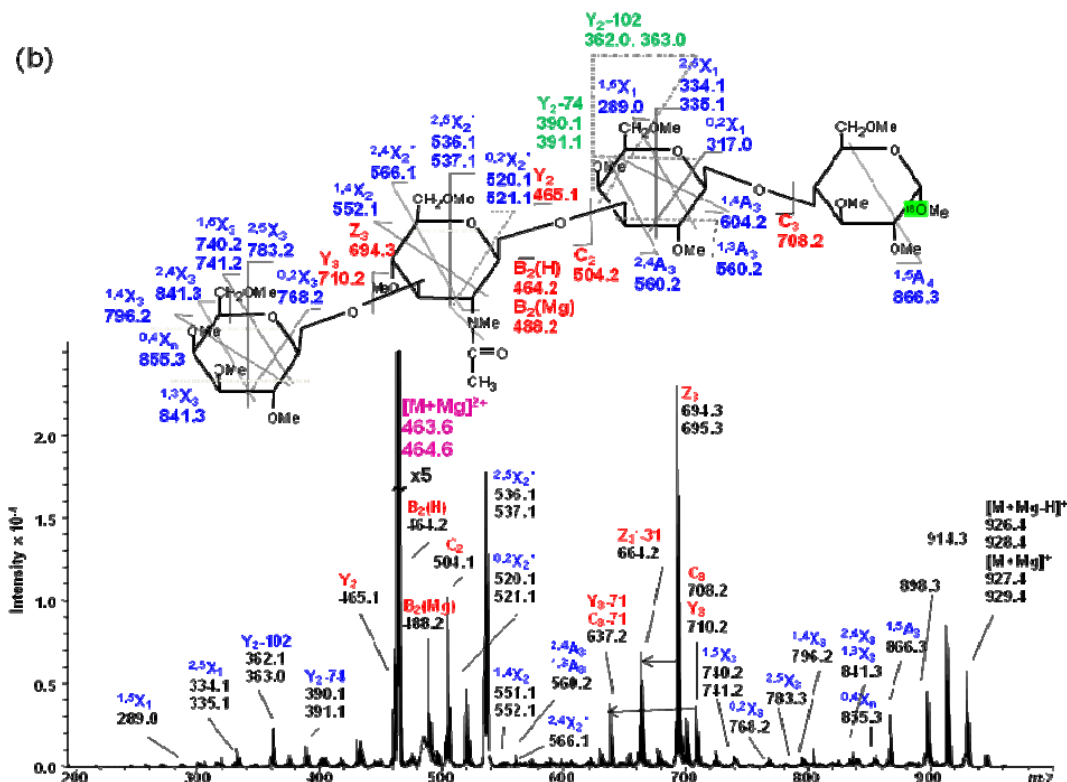

7. (a) CID and (b) ) ETD fragmentation of  $^{16}\text{O}/^{18}\text{O}$  labeled and permethylated LNnT  $[\text{M} + \text{Mg}]^{2+}$   $m/z$  463.6/464.6. Fragment ion assignments correspond to  $^{18}\text{O}$ -labeled species.

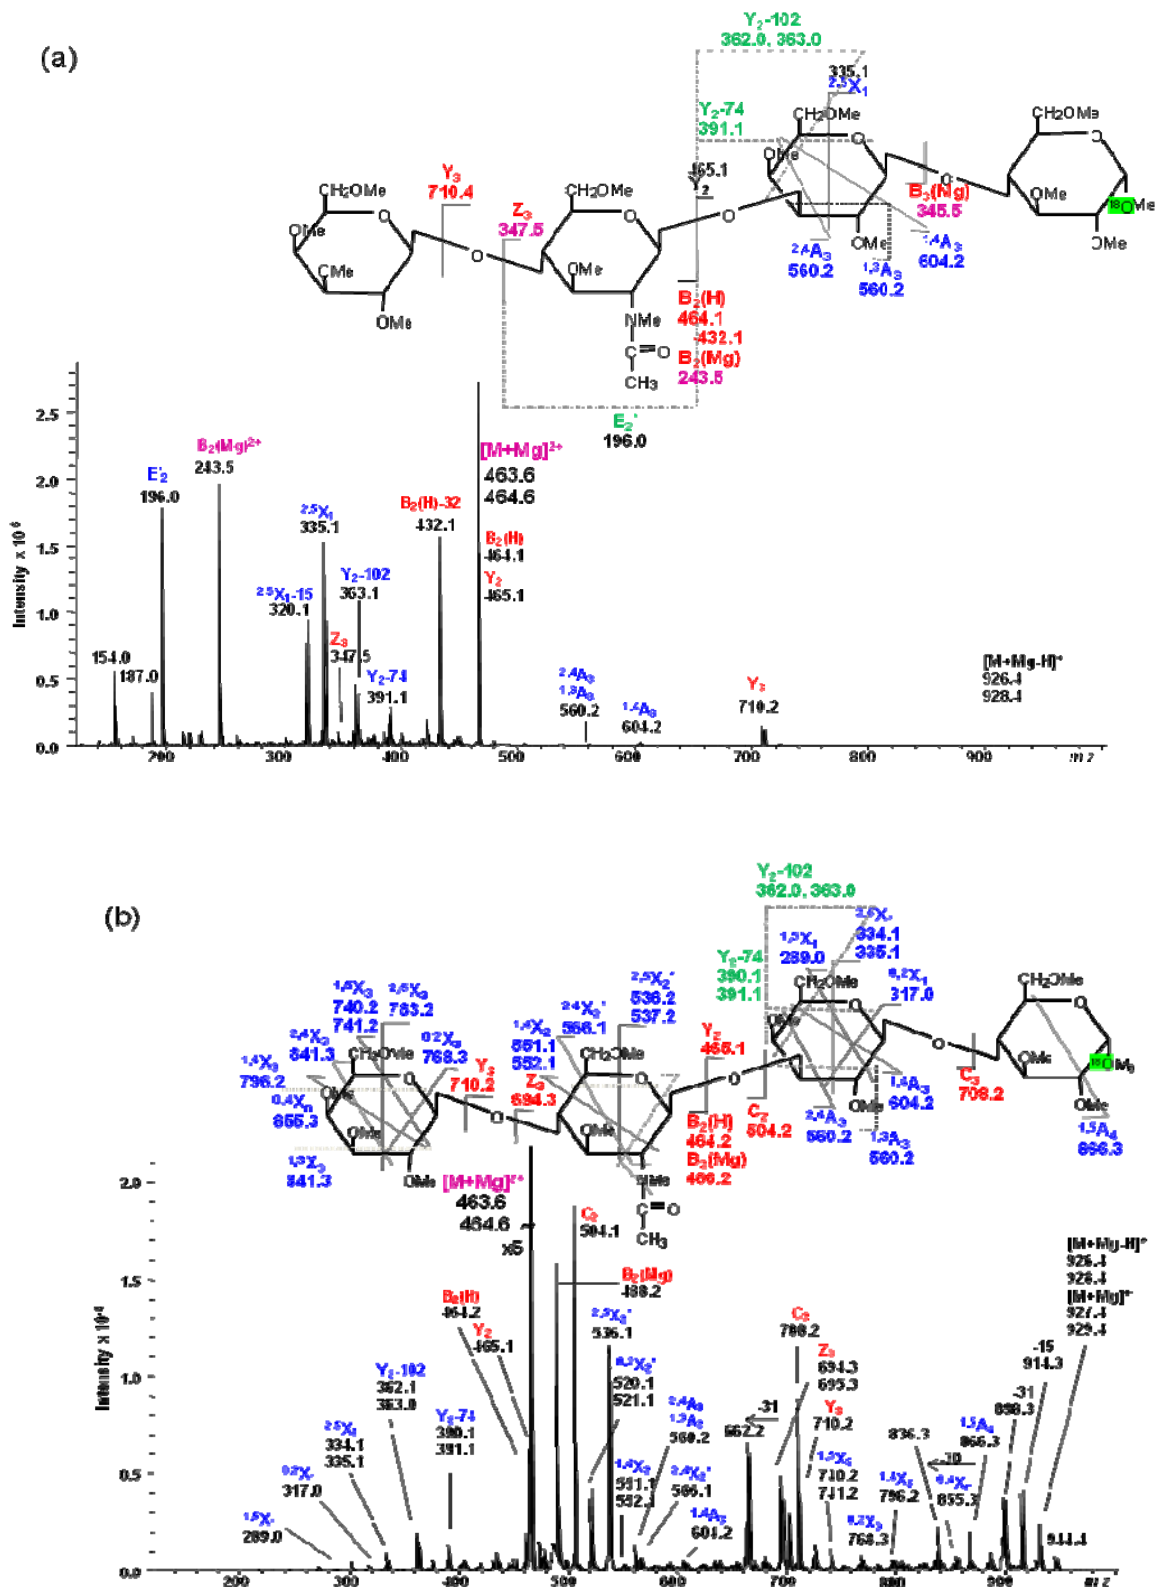



8. (a) CID and (b) ETD fragmentation of  $^{16}\text{O}/^{18}\text{O}$  labeled and permethylated LSTa  $[\text{M} + \text{Mg}]^{2+}$   $m/z$  644.2/645.2. Fragment ion assignments correspond to  $^{18}\text{O}$ -labeled species.

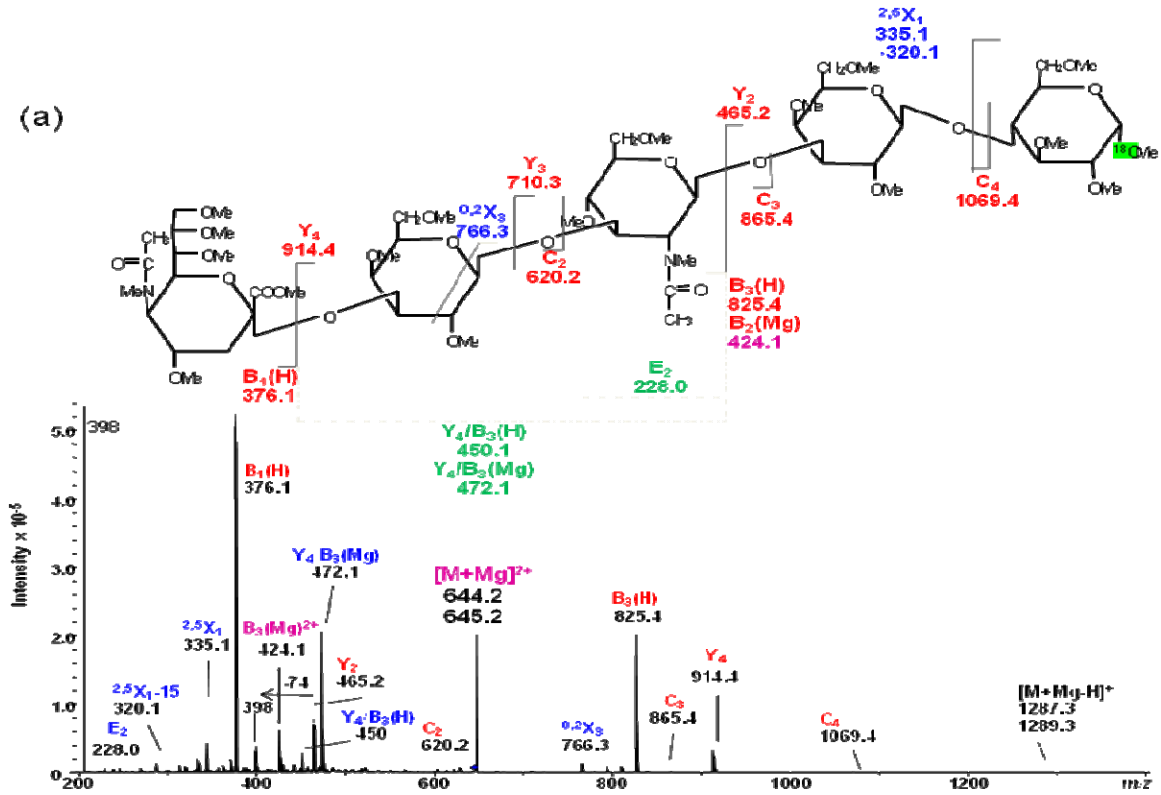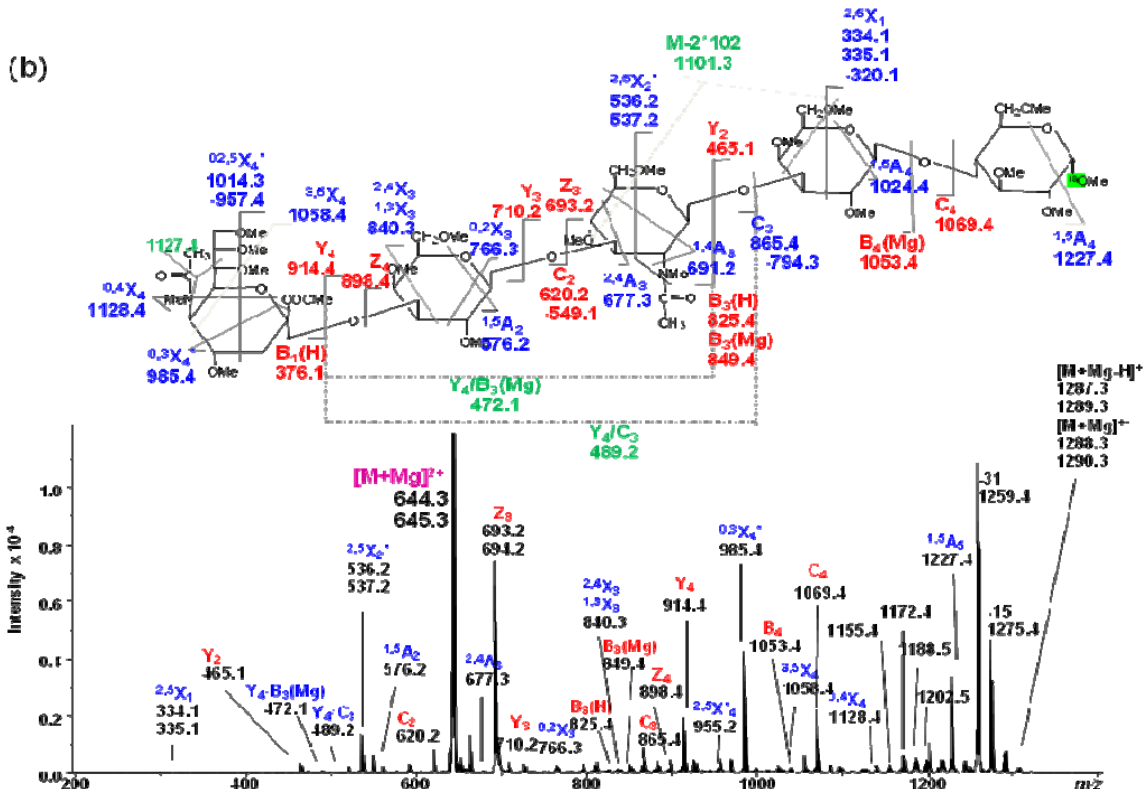

9. (a) CID and (b) ETD fragmentation of <sup>16</sup>O/<sup>18</sup>O labeled and permethylated LSTc [M + Mg]<sup>2+</sup> *m/z* 644.2/645.2. Fragment ion assignments correspond to <sup>18</sup>O-labeled species.

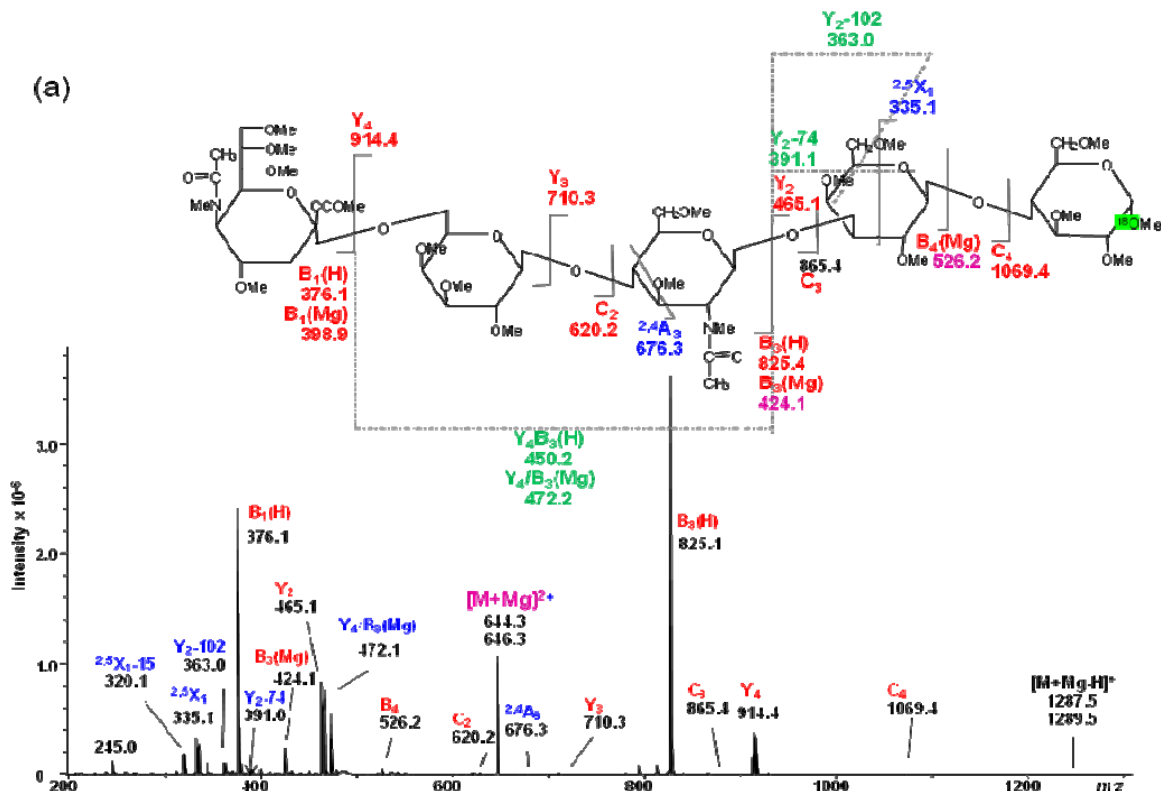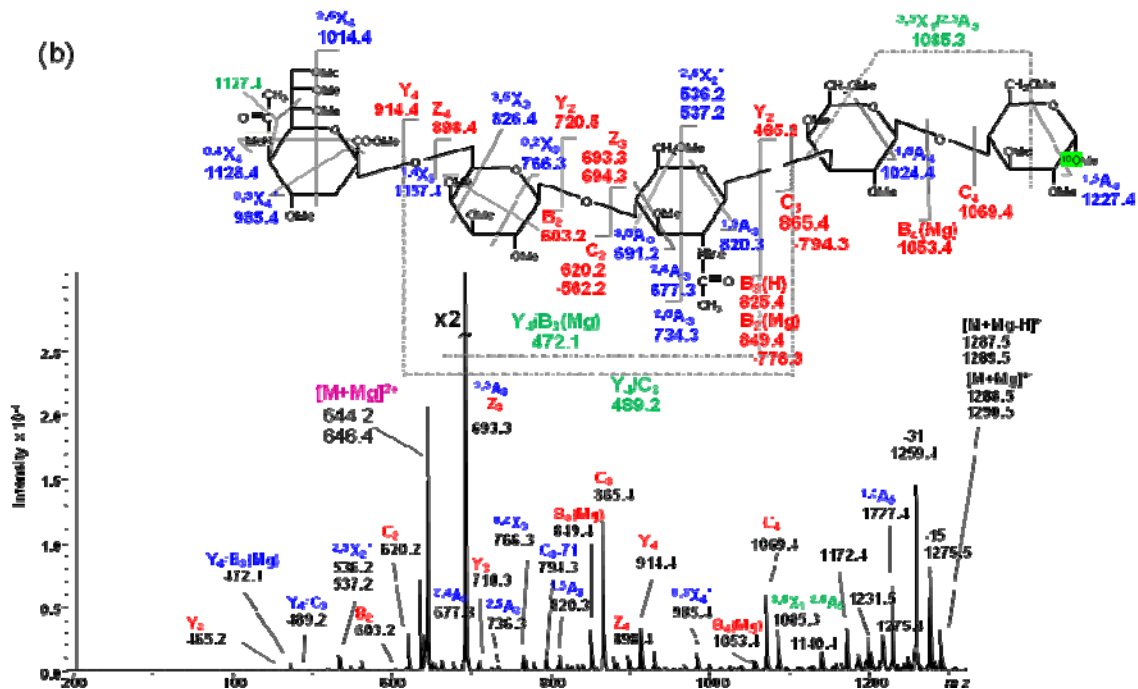

10. (a) CID and (b) ETD fragmentation of  $^{16}\text{O}/^{18}\text{O}$  labeled and permethylated LSTb  $[\text{M} + \text{Mg}]^{2+}$   $m/z$  644.2/645.2. Fragment ion assignments correspond to  $^{18}\text{O}$ -labeled species.

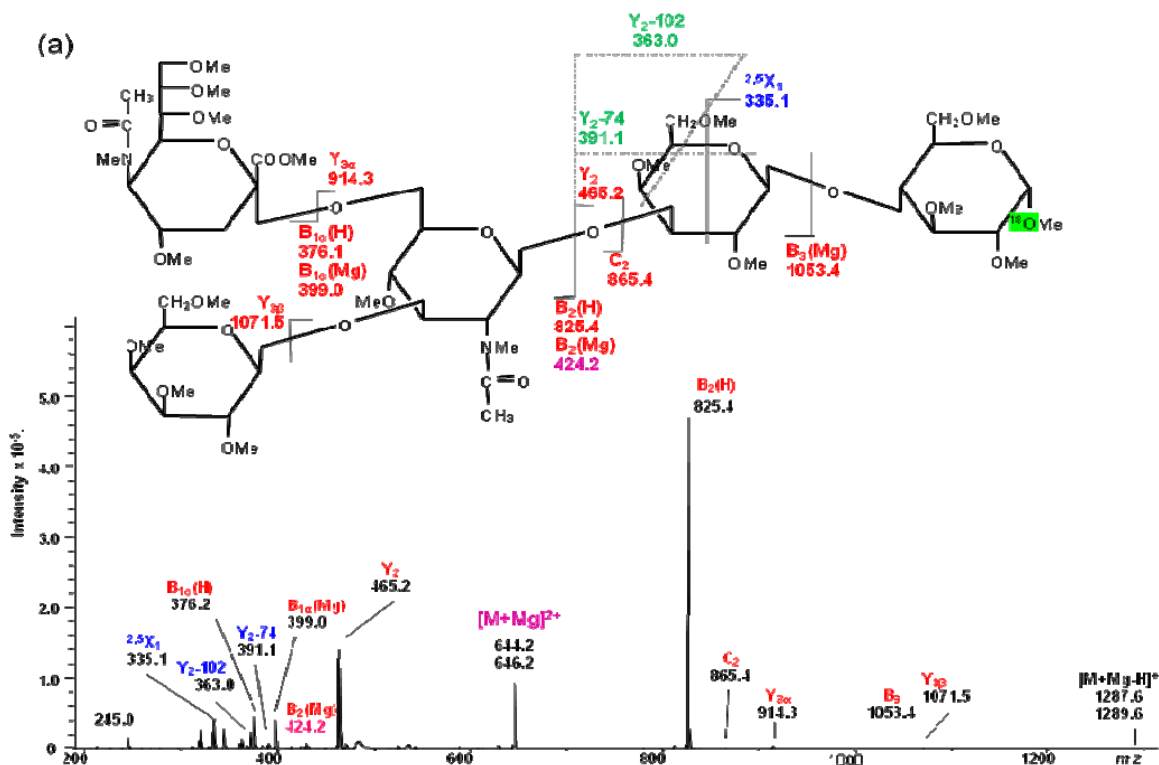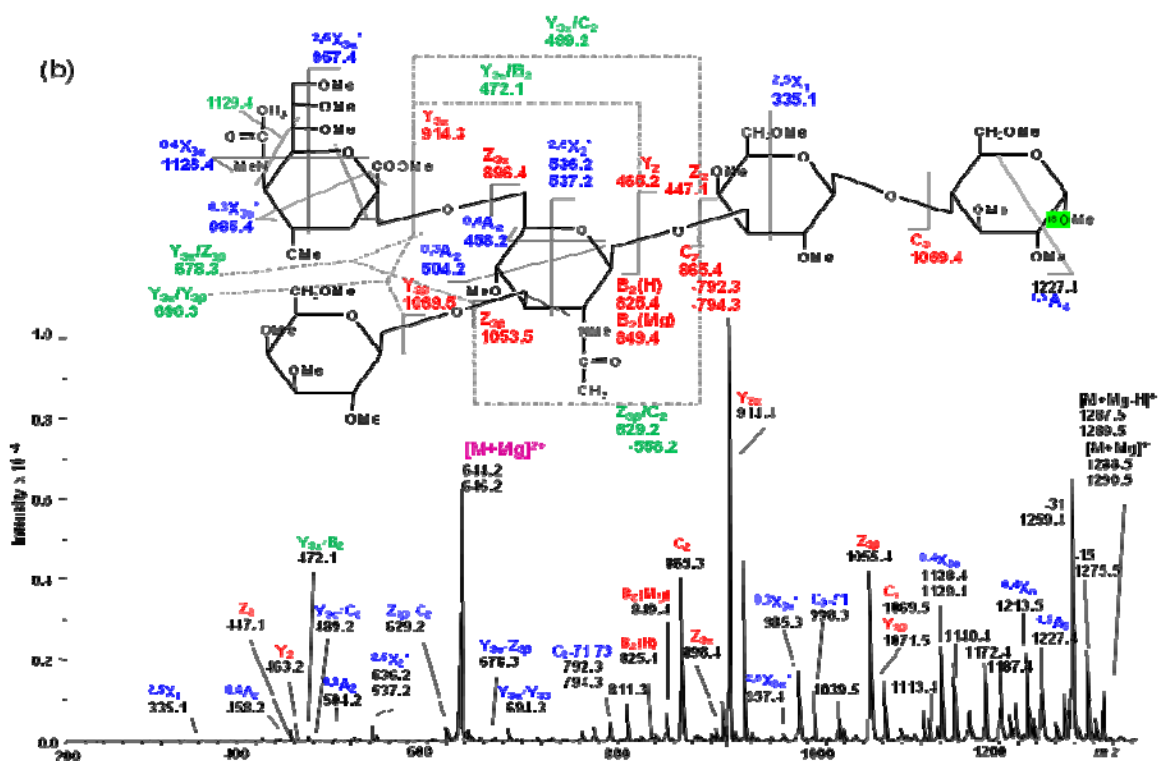

11. ETD/CID MS<sup>3</sup> fragmentation of reduced and permethylated LNT  $[M + Mg]^{2+}$   $m/z$  708.2

A mixture of C and Z ions

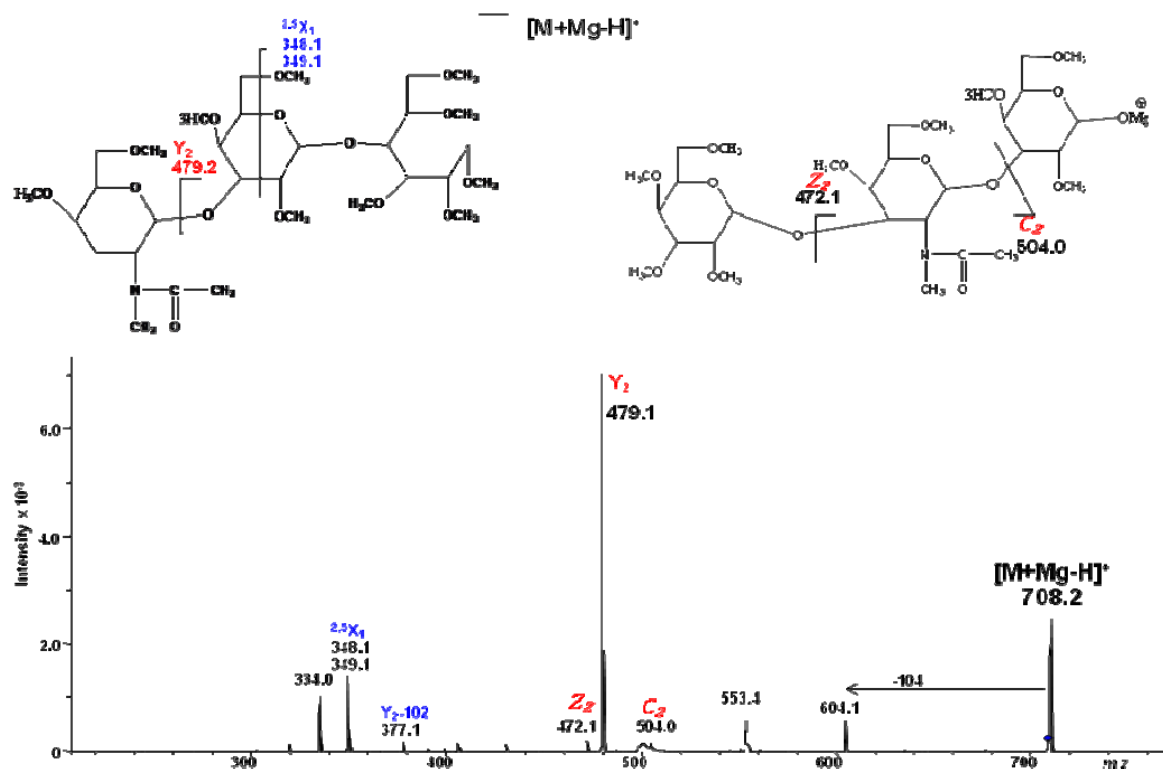

12. ETD/CID MS<sup>3</sup> fragmentation of reduced and permethylated LNT [M + Mg]<sup>2+</sup> m/z 708.2  
 A mixture of C and Z ions

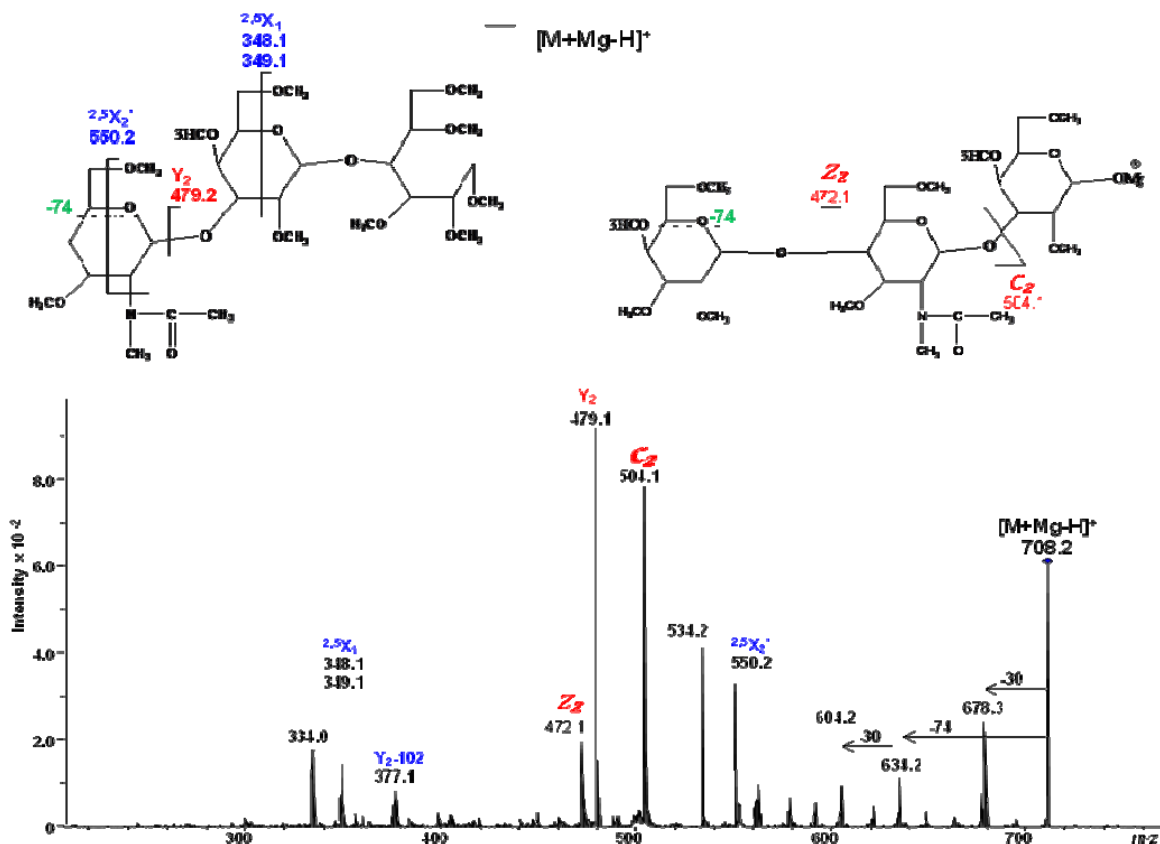

Supplement: NIHMS444345-supplement-supplementary_data.pdf [file NIHMS444345-supplement-supplementary_data.pdf]
